# Supplementary material
Source: PubMed Central journal article supplement (PMC5392153)
Supplement: NIHMS848989-supplement-01.pdf [file NIHMS848989-supplement-01.pdf]

**Supplemental Digital Content – Figure 1: CAM-ICU-7 scores in relation with the number of items completed on the DRS-R-98 scale**

**Supplemental Digital Content – Figure 2: Receiver operating characteristics of CAM-ICU-7 and delirium duration for mortality (2a) and discharge destination (2b)**

**Supplemental Digital Content – Figure 3: Distribution of CAM-ICU-7 scores as a function of level of sedation determined by the Richmond Sedation-Agitation Scale (RASS) scores. Assessments with a CAM-ICU-7 score of 7 (represented by brown color in the bars) denoting severe delirium have similar distributions of RASS scores of -3 and -2 (sedated), or 2 and 3 (agitated).**
